# Supplementary material for: Change in N-Glycosylation of Plasma Proteins in Japanese Semisupercentenarians
Source: PubMed Central journal article supplement (PMC4641608; doi:10.1371/journal.pone.0142645), 2015-11-11

S5 Fig.

(A)

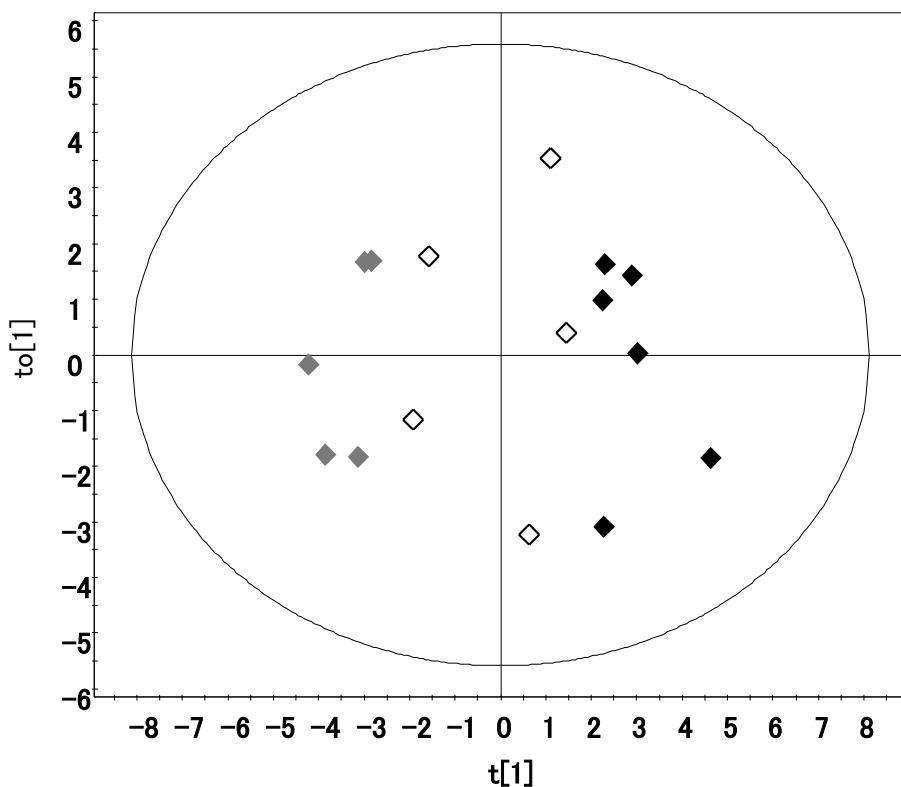

(B)

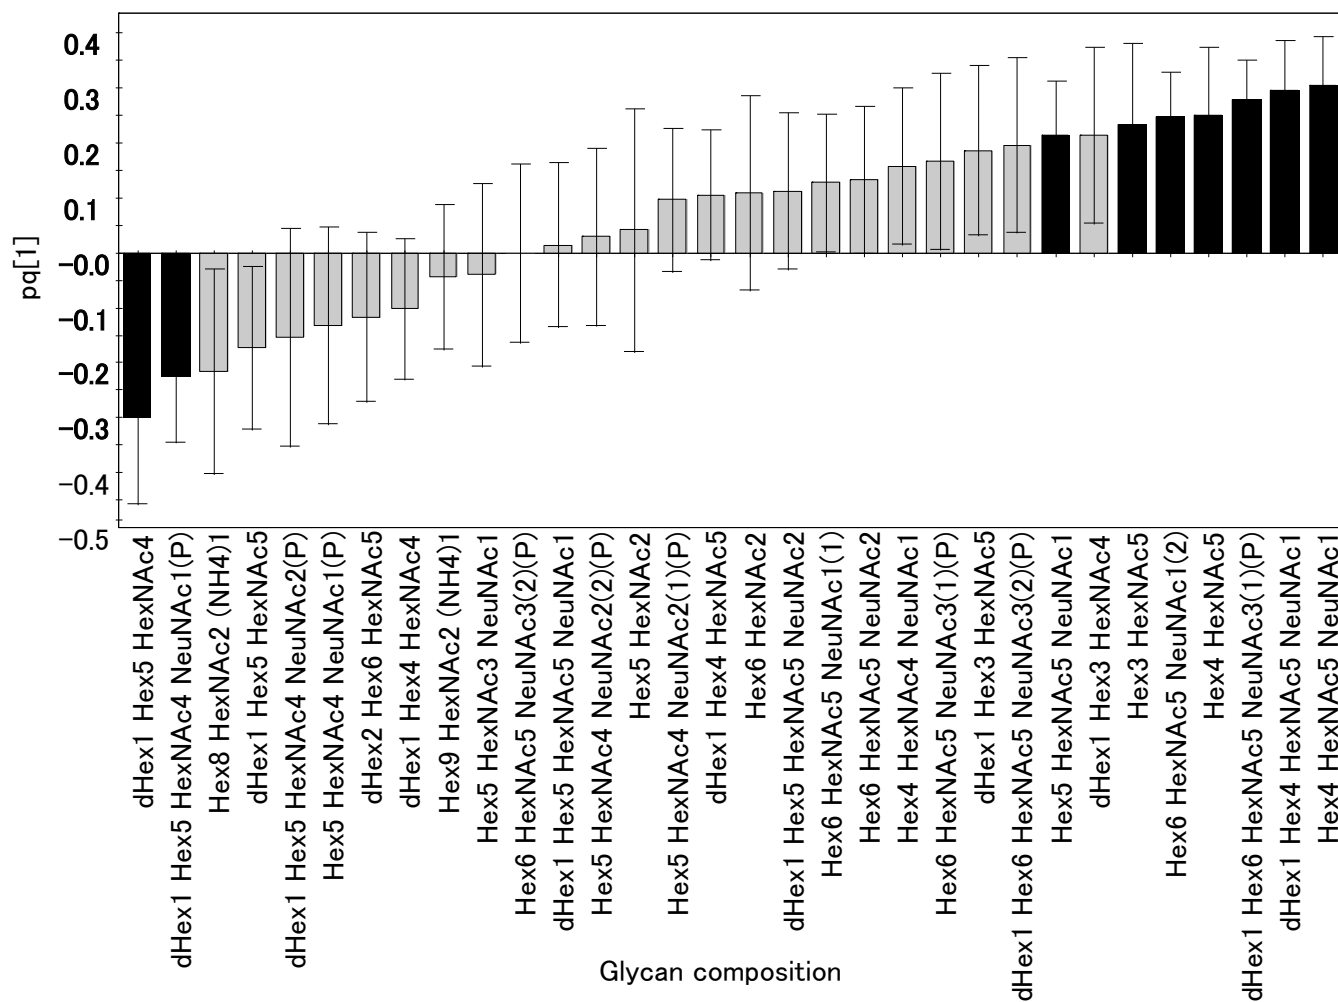

Supplement: pone.0142645.s005.pdf [file pone.0142645.s005.pdf]
