# Supplementary material for: Change in N-Glycosylation of Plasma Proteins in Japanese Semisupercentenarians
Source: PubMed Central journal article supplement (PMC4641608; doi:10.1371/journal.pone.0142645), 2015-11-11
Supplement: pone.0142645.s008.pdf [file pone.0142645.s008.pdf]

S1 Table. Retention time and peak area ratio of each N-glycan detected in positive and negative ion modes

| Composition <sup>1,2</sup>                   | Observed <i>m/z</i> | Polarity | Charge state | Young 1 |                 | Young 2 |                 | Young 3 |                 | Young 4 |                 | Young 5 |                 | Aged 1 |                 | Aged 2 |                 | Aged 3 |                 | Aged 4 |                 | Aged 5 |                 | SSC 1 |                 | SSC 2 |                 | SSC 3 |                 | SSC 4 |                 | SSC 5 |                 | SSC 6 |                 |
|----------------------------------------------|---------------------|----------|--------------|---------|-----------------|---------|-----------------|---------|-----------------|---------|-----------------|---------|-----------------|--------|-----------------|--------|-----------------|--------|-----------------|--------|-----------------|--------|-----------------|-------|-----------------|-------|-----------------|-------|-----------------|-------|-----------------|-------|-----------------|-------|-----------------|
|                                              |                     |          |              | RT      | Peak Area Ratio | RT      | Peak Area Ratio | RT      | Peak Area Ratio | RT      | Peak Area Ratio | RT      | Peak Area Ratio | RT     | Peak Area Ratio | RT     | Peak Area Ratio | RT     | Peak Area Ratio | RT     | Peak Area Ratio | RT     | Peak Area Ratio | RT    | Peak Area Ratio | RT    | Peak Area Ratio | RT    | Peak Area Ratio | RT    | Peak Area Ratio | RT    | Peak Area Ratio | RT    | Peak Area Ratio |
| Hex5 HexNAc2                                 | 1237.47             | Positive | 1            | 17.31   | 0.202           | 17.37   | 0.184           | 17.47   | 0.080           | 17.44   | 0.165           | 17.48   | 0.118           | 17.40  | 0.049           | 17.44  | 0.290           | 17.29  | 0.308           | 17.40  | 0.126           | 17.48  | 0.245           | 17.29 | 0.301           | 17.31 | 0.202           | 17.31 | 0.175           | 17.36 | 0.118           | 17.24 | 0.029           | 17.43 | 0.131           |
| Hex5 HexNAc2                                 | 1399.53             | Positive | 1            | 14.40   | 0.069           | 14.65   | 0.093           | 14.86   | 0.055           | 14.70   | 0.057           | 14.88   | 0.050           | 14.63  | 0.030           | 14.70  | 0.097           | 14.58  | 0.060           | 14.59  | 0.100           | 14.84  | 0.043           | 14.63 | 0.165           | 14.82 | 0.067           | 14.69 | 0.060           | 14.61 | 0.044           | 14.61 | 0.118           | 14.78 | 0.076           |
| Hex5 HexNAc2 (NH <sub>4</sub> ) <sup>+</sup> | 870.35              | Positive | 2            | 13.72   | 0.632           | 13.89   | 0.475           | 14.08   | 0.432           | 13.91   | 0.309           | 13.88   | 0.311           | 13.96  | 0.350           | 13.89  | 0.264           | 13.79  | 0.523           | 13.80  | 0.417           | 13.86  | 0.421           | 13.82 | 0.340           | 13.88 | 0.289           | 13.95 | 0.378           | 13.86 | 0.196           | 13.85 | 0.160           | 13.88 | 0.166           |
| Hex5 HexNAc2 (NH <sub>4</sub> ) <sup>+</sup> | 951.85              | Positive | 2            | 13.85   | 1.451           | 14.15   | 1.096           | 14.22   | 1.099           | 14.18   | 1.299           | 14.01   | 1.508           | 14.09  | 0.581           | 14.16  | 0.928           | 13.92  | 1.533           | 14.04  | 2.022           | 14.13  | 2.468           | 14.04 | 0.773           | 13.99 | 1.271           | 14.07 | 1.452           | 13.98 | 1.003           | 14.08 | 1.037           | 14.13 | 0.855           |
| Hex5 HexNAc5                                 | 761.80              | Positive | 2            | 10.11   | 0.036           | 10.12   | 0.053           | 10.11   | 0.046           | 10.25   | 0.059           | 10.23   | 0.022           | 10.40  | 0.081           | 10.24  | 0.095           | 10.13  | 1.190           | 10.12  | 0.080           | 10.13  | 0.491           | 10.38 | 0.087           | 10.13 | 0.325           | 10.27 | 0.255           | 10.10 | 0.092           | 10.27 | 0.688           | 10.27 | 0.122           |
| Hex4 HexNAc5                                 | 842.82              | Positive | 2            | 11.34   | 0.140           | 11.38   | 0.129           | 11.35   | 0.117           | 11.49   | 0.118           | 11.48   | 0.084           | 11.66  | 0.112           | 11.50  | 0.130           | 11.25  | 0.187           | 11.36  | 0.145           | 11.45  | 0.415           | 11.51 | 0.171           | 11.43 | 0.385           | 11.39 | 0.279           | 11.55 | 0.178           | 11.43 | 0.574           | 11.57 | 0.223           |
| Hex5 HexNAc3 NeuNAc1                         | 866.32              | Positive | 2            | 14.23   | 0.223           | 14.52   | 0.278           | 14.66   | 0.439           | 14.31   | 0.218           | 14.15   | 0.262           | 14.09  | 0.071           | 14.28  | 0.395           | 14.19  | 0.257           | 14.17  | 0.366           | 14.24  | 0.255           | 14.04 | 0.075           | 14.37 | 0.494           | 14.2  | 0.270           | 13.98 | 0.276           | 14.08 | 0.200           | 14.25 | 0.213           |
| Hex4 HexNAc4 NeuNAc1                         | 886.84              | Positive | 2            | 15.24   | 0.488           | 15.37   | 0.560           | 15.56   | 0.647           | 15.36   | 0.680           | 15.17   | 0.325           | 15.11  | 0.360           | 15.34  | 0.789           | 15.19  | 1.441           | 15.26  | 0.955           | 15.24  | 1.254           | 15.01 | 0.464           | 15.24 | 1.099           | 15.03 | 0.693           | 14.95 | 0.820           | 14.98 | 0.947           | 15.19 | 0.804           |
| Hex5 HexNAc4 NeuNAc1(P)                      | 967.86              | Positive | 2            | 15.84   | 13.968          | 16.16   | 15.567          | 16.31   | 14.680          | 15.95   | 9.241           | 15.80   | 4.616           | 15.63  | 5.644           | 15.90  | 7.103           | 16.00  | 15.533          | 15.99  | 13.006          | 15.90  | 7.931           | 15.71 | 4.126           | 15.87 | 17.257          | 15.56 | 6.940           | 14.69 | 5.340           | 15.55 | 7.877           | 15.82 | 6.137           |
| Hex5 HexNAc4 NeuNAc2(1)(P)                   | 1113.41(1)          | Positive | 2            | 16.34   | 35.458          | 16.59   | 31.543          | 16.80   | 35.418          | 16.11   | 36.634          | 15.87   | 48.764          | 15.87  | 53.298          | 16.06  | 37.844          | 16.25  | 32.127          | 16.24  | 29.036          | 16.06  | 27.798          | 15.56 | 43.276          | 16.2  | 37.684          | 15.72 | 49.037          | 15.69 | 48.109          | 15.71 | 44.266          | 15.82 | 41.126          |
| Hex5 HexNAc4 NeuNAc2(2)(P)                   | 1113.41(2)          | Positive | 2            | 20.05   | 7.894           | 19.81   | 7.736           | 20.02   | 8.165           | 19.10   | 9.201           | 19.26   | 8.364           | 19.16  | 10.496          | 19.31  | 9.382           | 20.18  | 6.418           | 19.89  | 8.085           | 19.45  | 11.746          | 18.97 | 9.789           | 19.87 | 7.334           | 19.17 | 9.192           | 19.39 | 11.351          | 19.41 | 6.929           | 18.95 | 7.646           |
| Hex4 HexNAc5 NeuNAc1                         | 988.37              | Positive | 2            | 12.03   | 0.324           | 12.21   | 0.357           | 12.47   | 0.531           | 12.05   | 0.485           | 11.88   | 0.270           | 12.10  | 0.708           | 12.22  | 0.704           | 11.96  | 0.603           | 12.07  | 0.432           | 12.03  | 1.419           | 12.11 | 1.123           | 12.29 | 1.267           | 12.13 | 1.397           | 11.98 | 0.790           | 12.17 | 1.877           | 12.02 | 1.176           |
| Hex5 HexNAc5 NeuNAc1                         | 1069.40             | Positive | 2            | 12.86   | 1.215           | 13.19   | 1.310           | 13.34   | 1.366           | 13.04   | 1.355           | 12.88   | 0.952           | 12.97  | 0.715           | 13.21  | 2.561           | 12.96  | 1.496           | 12.92  | 1.426           | 12.88  | 1.718           | 12.98 | 1.920           | 13.14 | 1.635           | 13.13 | 1.699           | 12.85 | 1.363           | 13.02 | 1.124           | 13    | 1.502           |
| Hex5 HexNAc5 NeuNAc1(1)                      | 1150.44(1)          | Positive | 2            | 16.59   | 0.144           | 16.67   | 0.130           | 16.62   | 0.153           | 16.50   | 0.358           | 16.47   | 0.375           | 16.30  | 0.279           | 16.53  | 0.894           | 16.48  | 0.117           | 16.72  | 0.185           | 16.55  | 0.432           | 16.22 | 0.505           | 16.43 | 0.091           | 16.17 | 0.626           | 16.19 | 0.368           | 16.1  | 0.205           | 16.33 | 0.445           |
| Hex5 HexNAc5 NeuNAc1(2)                      | 1150.44(2)          | Positive | 2            | 17.96   | 0.093           | 18.16   | 0.314           | 18.14   | 0.146           | 17.83   | 0.240           | 17.94   | 0.179           | 17.77  | 0.120           | 17.99  | 0.344           | 18.10  | 0.251           | 18.11  | 0.305           | 18.07  | 0.216           | 17.68 | 0.393           | 17.86 | 0.278           | 17.56 | 0.444           | 17.81 | 0.461           | 17.62 | 0.326           | 17.66 | 0.520           |
| Hex5 HexNAc5 NeuNAc2                         | 1295.99             | Positive | 2            | 20.34   | 0.230           | 20.07   | 0.524           | 20.21   | 0.301           | 19.48   | 0.594           | 19.62   | 0.513           | 19.54  | 0.467           | 19.70  | 0.858           | 20.58  | 0.622           | 20.19  | 0.661           | 19.72  | 0.704           | 19.46 | 1.104           | 20.23 | 0.690           | 19.52 | 0.402           | 19.56 | 0.378           | 22.33 | 0.366           | 19.29 | 0.902           |
| Hex5 HexNAc5 NeuNAc3(1)(P)                   | 961.35(1)           | Positive | 3            | 19.85   | 0.658           | 19.66   | 0.928           | 19.84   | 0.627           | 18.78   | 2.096           | 18.82   | 1.794           | 18.81  | 2.111           | 18.92  | 2.384           | 19.92  | 1.219           | 19.71  | 2.383           | 19.15  | 3.561           | 18.47 | 1.697           | 19.7  | 0.869           | 18.73 | 2.280           | 18.83 | 3.055           | 18.98 | 2.256           | 18.44 | 2.105           |
| Hex5 HexNAc5 NeuNAc3(2)(P)                   | 961.35(2)           | Positive | 3            | 20.78   | 2.660           | 20.34   | 4.289           | 20.80   | 2.624           | 19.48   | 3.456           | 19.62   | 4.265           | 19.71  | 4.284           | 19.87  | 4.971           | 21.07  | 2.788           | 20.48  | 7.599           | 19.90  | 6.627           | 19.3  | 3.625           | 19.7  | 0.869           | 19.68 | 3.757           | 19.65 | 7.151           | 20.03 | 2.465           | 19.29 | 4.350           |
| dHex1 Hex3 HexNAc4                           | 1465.59             | Positive | 1            | 16.19   | 0.056           | 16.34   | 0.150           | 16.31   | 0.167           | 16.50   | 0.250           | 16.47   | 0.120           | 16.30  | 0.078           | 16.44  | 0.525           | 16.18  | 0.146           | 16.39  | 0.072           | 16.46  | 0.465           | 16.31 | 0.526           | 16.05 | 0.321           | 16.25 | 0.226           | 16.3  | 0.398           | 16.1  | 0.445           | 16.42 | 1.177           |
| dHex1 Hex4 HexNAc4                           | 814.32              | Positive | 2            | 17.09   | 2.311           | 17.17   | 2.903           | 17.18   | 2.187           | 17.25   | 3.251           | 17.25   | 1.793           | 17.08  | 1.557           | 17.14  | 2.676           | 17.11  | 3.669           | 17.21  | 5.664           | 17.19  | 4.465           | 17.09 | 0.743           | 16.89 | 1.846           | 16.93 | 1.105           | 17.15 | 1.927           | 16.84 | 2.268           | 17.06 | 1.694           |
| dHex1 Hex5 HexNAc4                           | 895.34              | Positive | 2            | 17.88   | 1.150           | 18.01   | 1.788           | 18.11   | 2.120           | 18.00   | 1.595           | 18.09   | 1.522           | 17.96  | 0.797           | 17.91  | 0.643           | 17.83  | 0.521           | 18.03  | 1.308           | 18.07  | 0.839           | 17.85 | 0.287           | 17.59 | 0.439           | 17.64 | 0.197           | 18.07 | 0.334           | 17.82 | 0.606           | 17.91 | 0.724           |
| dHex1 Hex3 HexNAc5                           | 834.33              | Positive | 2            | 12.88   | 0.287           | 13.05   | 0.258           | 13.03   | 0.215           | 13.05   | 0.399           | 13.19   | 0.215           | 13.27  | 0.372           | 13.21  | 0.329           | 13.82  | 1.756           | 13.07  | 0.404           | 13.14  | 1.660           | 13.25 | 0.283           | 13.01 | 0.085           | 13.14 | 0.413           | 13.15 | 1.124           | 13.28 | 1.008           |       |                 |
| dHex1 Hex4 HexNAc5                           | 915.86              | Positive | 2            | 13.72   | 1.461           | 13.89   | 1.688           | 13.92   | 0.986           | 14.18   | 1.138           | 14.15   | 0.987           | 14.09  | 0.630           | 14.16  | 1.872           | 13.79  | 2.085           | 13.92  | 2.503           | 13.99  | 3.196           | 14.04 | 1.354           | 13.88 | 1.744           | 13.95 | 1.178           | 13.98 | 0.841           | 13.97 | 2.690           | 14.13 | 1.184           |
| dHex1 Hex5 HexNAc5                           | 996.88              | Positive | 2            | 14.23   | 1.477           | 14.41   | 1.693           | 14.50   | 1.016           | 14.58   | 0.757           | 14.56   | 0.842           | 14.50  | 0.626           | 14.57  | 1.506           | 14.32  | 0.835           | 14.31  | 1.289           | 14.50  | 1.655           | 14.42 | 0.602           | 14.37 | 1.112           | 14.45 | 0.883           | 14.36 | 0.427           | 14.35 | 1.077           | 14.65 | 0.583           |
| dHex2 Hex5 HexNAc5                           | 1150.95             | Positive | 2            | 14.72   | 0.930           | 15.01   | 5.964           | 15.16   | 3.676           | 14.95   | 2.563           | 14.80   | 1.733           | 14.75  | 0.209           | 14.96  | 1.649           | 14.81  | 6.337           | 14.72  | 4.537           | 14.88  | 4.855           | 14.63 | 1.382           | 14.73 | 4.064           | 14.69 | 2.884           | 14.61 | 1.009           | 14.6  | 2.698           | 14.76 | 1.490           |
| dHex1 Hex5 HexNAc4 NeuNAc1(P)                | 1040.89             | Positive | 2            | 17.88   | 6.452           | 18.08   | 6.798           | 17.98   | 8.040           | 17.67   | 6.134           | 17.85   | 4.626           | 17.69  | 1.217           | 17.64  | 2.252           | 18.00  | 3.960           | 17.95  | 4.692           | 17.82  | 3.537           | 17.53 | 5.314           | 17.68 | 4.082           | 17.4  | 1.489           | 17.81 | 1.962           | 17.46 | 3.121           | 17.51 | 4.321           |
| dHex1 Hex5 HexNAc4 NeuNAc2(P)                | 1186.44             | Positive | 2            | 18.23   | 6.434           | 18.35   | 6.249           | 18.41   | 8.780           | 17.78   | 10.527          | 17.77   | 9.002           | 17.61  | 10.563          | 17.74  | 9.038           | 18.37  | 4.450           | 18.20  | 7.018           | 17.90  | 6.110           | 17.38 | 7.394           | 18.11 | 6.130           | 17.48 | 5.069           | 17.65 | 5.808           | 17.54 | 6.316           | 17.43 | 8.073           |
| dHex1 Hex5 HexNAc5 NeuNAc1                   | 1061.41             | Positive | 2            | 13.97   | 0.559           | 14.26   | 0.393           | 14.40   | 0.283           | 14.45   | 0.627           | 14.15   | 0.300           | 14.09  | 0.484           | 14.28  | 1.187           | 14.14  | 1.046           | 14.17  | 0.717           | 14.13  | 2.072           | 13.93 | 1.926           | 14.25 | 1.349           | 14.2  | 1.239           | 13.68 | 1.150           | 14.68 | 1.617           | 14.13 | 1.290           |
| dHex1 Hex5 HexNAc5 NeuNAc2                   | 1142.43             | Positive | 2            | 14.72   | 0.632           | 15.01   | 5.307           | 15.29   | 3.756           | 14.95   | 4.240           | 14.80   | 4.038           | 14.75  | 1.143           | 14.83  | 5.024           | 14.81  | 8.795           | 14.84  | 3.455           | 14.88  | 2.974           | 14.63 | 6.837           | 14.85 | 4.011           | 14.79 | 3.734           | 14.61 | 3.252           | 14.6  | 3.541           | 14.76 | 5.667           |
| dHex1 Hex5 HexNAc5 NeuNAc2                   | 1287.98             | Positive | 2            | 15.60   | 0.824           |         |                 |         |                 |         |                 |         |                 |        |                 |        |                 |        |                 |        |                 |        |                 |       |                 |       |                 |       |                 |       |                 |       |                 |       |                 |
