# Supplementary material for: Change in N-Glycosylation of Plasma Proteins in Japanese Semisupercentenarians
Source: PubMed Central journal article supplement (PMC4641608; doi:10.1371/journal.pone.0142645), 2015-11-11
Supplement: pone.0142645.s009.pdf [file pone.0142645.s009.pdf]

**S2 Table. Weight (pq[1]) and its error (SE) of each *N*-glycan calculated using O-PLS**

| Var ID (Primary) <sup>1, 2</sup> | Var ID (Polarity) | Var ID (m/z) | pq[1]   | SE     | pq[1]/SE |
|----------------------------------|-------------------|--------------|---------|--------|----------|
| dHex1 Hex5 HexNAc4               | Positive          | 895.34       | -0.2309 | 0.1004 | 2.2994   |
| Hex5 HexNAc4 NeuNAc2(1)(N)       | Negative          | 1111.39(1)   | -0.2038 | 0.0893 | 2.2821   |
| dHex1 Hex5 HexNAc4 NeuNAc2(N)    | Negative          | 1184.43      | -0.1908 | 0.1015 | 1.8791   |
| dHex1 Hex5 HexNAc4 NeuNAc1(N)    | Negative          | 1038.88      | -0.1817 | 0.1001 | 1.8150   |
| dHex1 Hex5 HexNAc4 NeuNAc1(P)    | Positive          | 1040.89      | -0.1765 | 0.0848 | 2.0820   |
| Hex8 HexNAc2 (NH4)1              | Positive          | 870.83       | -0.1689 | 0.1412 | 1.1957   |
| dHex1 Hex5 HexNAc5               | Positive          | 996.88       | -0.1398 | 0.1111 | 1.2589   |
| Hex5 HexNAc4 NeuNAc1(N)          | Negative          | 965.85       | -0.1319 | 0.1412 | 0.9341   |
| dHex2 Hex6 HexNAc5               | Positive          | 1150.95      | -0.1085 | 0.1422 | 0.7636   |
| Hex5 HexNAc4 NeuNAc1(P)          | Positive          | 967.86       | -0.1078 | 0.1563 | 0.6894   |
| dHex1 Hex5 HexNAc4 NeuNAc2(P)    | Positive          | 1186.44      | -0.1043 | 0.1444 | 0.7223   |
| dHex1 Hex4 HexNAc4               | Positive          | 814.32       | -0.0843 | 0.0978 | 0.8619   |
| Hex5 HexNAc4 NeuNAc2(2)(N)       | Negative          | 1111.39(2)   | -0.0733 | 0.1404 | 0.5222   |
| Hex9 HexNAc2 (NH4)1              | Positive          | 951.85       | -0.0509 | 0.0922 | 0.5525   |
| Hex5 HexNAc3 NeuNAc1             | Positive          | 866.32       | -0.0330 | 0.1343 | 0.2458   |
| dHex1 Hex5 HexNAc5 NeuNAc1       | Positive          | 1142.43      | 0.0087  | 0.1149 | 0.0761   |
| Hex6 HexNAc5 NeuNAc3(2)(P)       | Positive          | 961.35(2)    | 0.0300  | 0.1081 | 0.2772   |
| Hex5 HexNAc2                     | Positive          | 1237.47      | 0.0324  | 0.1344 | 0.2410   |
| Hex5 HexNAc4 NeuNAc2(2)(P)       | Positive          | 1113.41(2)   | 0.0378  | 0.0867 | 0.4358   |
| dHex1 Hex4 HexNAc5               | Positive          | 915.86       | 0.0458  | 0.0969 | 0.4728   |
| Hex6 HexNAc2                     | Positive          | 1399.53      | 0.0796  | 0.1267 | 0.6279   |
| Hex6 HexNAc5 NeuNAc3 (2)(N)      | Negative          | 1439.52(2)   | 0.0797  | 0.1084 | 0.7352   |
| Hex5 HexNAc4 NeuNAc2(1)(P)       | Positive          | 1113.41(1)   | 0.0848  | 0.1085 | 0.7818   |
| Hex7 HexNAc6 NeuNAc4 (1)         | Negative          | 1178.09(1)   | 0.0889  | 0.1232 | 0.7215   |
| dHex1 Hex5 HexNAc5 NeuNAc2       | Positive          | 1287.98      | 0.0991  | 0.1140 | 0.8695   |

| Var ID (Primary) <sup>1, 2</sup> | Var ID (Polarity) | Var ID (m/z) | pq[1]  | SE     | pq[1]/SE |
|----------------------------------|-------------------|--------------|--------|--------|----------|
| Hex4 HexNAc4 NeuNAc1             | Positive          | 886.84       | 0.1007 | 0.1336 | 0.7534   |
| Hex6 HexNAc5 NeuNAc1(1)          | Positive          | 1150.44(1)   | 0.1026 | 0.0955 | 1.0747   |
| dHex1 Hex3 HexNAc5               | Positive          | 834.83       | 0.1104 | 0.1283 | 0.8610   |
| Hex6 HexNAc5 NeuNAc2             | Positive          | 1295.99      | 0.1177 | 0.0978 | 1.2032   |
| Hex3 HexNAc5                     | Positive          | 761.8        | 0.1292 | 0.0898 | 1.4393   |
| Hex6 HexNAc5 NeuNAc3(1)(P)       | Positive          | 961.35(1)    | 0.1303 | 0.1192 | 1.0926   |
| dHex2 Hex7 HexNAc6 NeuNAc4 (1)   | Negative          | 1275.47(1)   | 0.1362 | 0.0915 | 1.4877   |
| Hex5 HexNAc5 NeuNAc1             | Positive          | 1069.4       | 0.1393 | 0.0668 | 2.0850   |
| Hex4 HexNAc5                     | Positive          | 842.82       | 0.1466 | 0.0783 | 1.8736   |
| dHex2 Hex6 HexNAc5 NeuNAc3       | Negative          | 1585.58      | 0.1474 | 0.1331 | 1.1071   |
| dHex2 Hex7 HexNAc6 NeuNAc4 (2)   | Negative          | 1275.47(2)   | 0.1535 | 0.0818 | 1.8775   |
| dHex1 Hex6 HexNAc5 NeuNAc3(1)(N) | Negative          | 1512.55(1)   | 0.1549 | 0.1151 | 1.3449   |
| dHex1 Hex7 HexNAc6 NeuNAc4 (1)   | Negative          | 1226.77(1)   | 0.1574 | 0.0789 | 1.9940   |
| Hex7 HexNAc6 NeuNAc4 (2)         | Negative          | 1178.09(2)   | 0.1608 | 0.0807 | 1.9926   |
| dHex3 Hex7 HexNAc6 NeuNAc4       | Negative          | 1324.14      | 0.1629 | 0.0960 | 1.6978   |
| dHex1 Hex7 HexNAc6 NeuNAc4 (2)   | Negative          | 1226.77(2)   | 0.1631 | 0.0718 | 2.2698   |
| dHex1 Hex6 HexNAc5 NeuNAc3(2)(P) | Positive          | 1514.57(2)   | 0.1644 | 0.1104 | 1.4897   |
| dHex1 Hex3 HexNAc4               | Positive          | 1465.59      | 0.1674 | 0.1264 | 1.3240   |
| dHex1 Hex7 HexNAc6 NeuNAc3       | Negative          | 1695.12      | 0.1714 | 0.0712 | 2.4073   |
| Hex6 HexNAc5 NeuNAc3 (1)(N)      | Negative          | 1439.52(1)   | 0.1929 | 0.0592 | 3.2581   |
| Hex4 HexNAc5 NeuNAc1             | Positive          | 988.37       | 0.2006 | 0.0596 | 3.3625   |
| dHex1 Hex4 HexNAc5 NeuNAc1       | Positive          | 1061.41      | 0.2055 | 0.0683 | 3.0082   |
| Hex6 HexNAc5 NeuNAc1(2)          | Positive          | 1150.44(2)   | 0.2101 | 0.0368 | 5.7084   |
| dHex1 Hex6 HexNAc5 NeuNAc3(2)(N) | Negative          | 1512.55(2)   | 0.2102 | 0.0921 | 2.2822   |
| dHex1 Hex6 HexNAc5 NeuNAc3(1)(P) | Positive          | 1514.57(1)   | 0.2164 | 0.0570 | 3.7928   |

<sup>1</sup>Numbers in parentheses represent isomers, and "N" or "P" in parentheses indicates data obtained from the negative or positive ion mode, respectively.

<sup>2</sup>Hex, hexose; HexNAc, *N*-acetylhexosamine; NeuNAc, *N*-acetylneuraminic acid; dHex, deoxyhexose; NH4, ammonium.
